# Supplementary material
Source: Springer Nature journal article supplement (https://www.springermedizin.de/resource/supplementary/12879_2009_872_MOESM1_ESM.pdf/9449536)

**a)**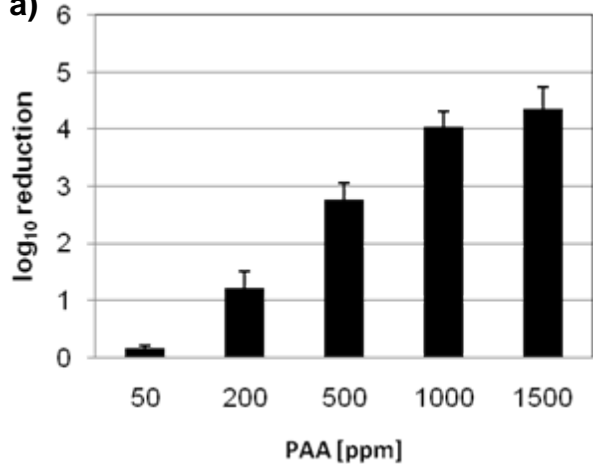**b)**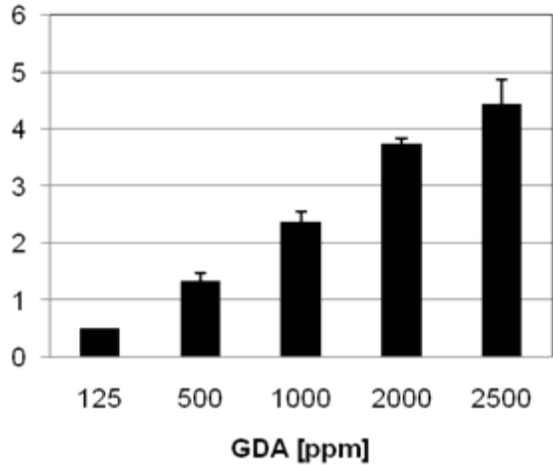

Supplement: MOESM1 [file 9449536]
